# Supplementary material for: IL8 and PMA Trigger the Regulation of Different Biological Processes in Granulocyte Activation
Source: Front Immunol. 2020 Jan 14;10:3064. doi: 10.3389/fimmu.2019.03064 (PMC6973177; doi:10.3389/fimmu.2019.03064)
Supplement: Supplementary file 3 [file Table_3.XLSX]

## Sheet: Suppl. Table 3
Supplemental Table 3: overview of gene names (left table) and enrichment categories (right table) from the 15 proteins with increased expression present in all three stimulation groups used in the experiment (LPS, PMA and IL8)
Proteins with ratio stimulus / mc ≥ 2 shared between all three stimuli (LPS, PMA, IL8)
Gene names for shared proteins from all stimuli (IL8, PMA, LPS)		Enrichment FDR	Genes in list	Total genes	Functional Category (Biological Processes)	Genes
AAMDC		0.0049425	2	12	Viral latency	HCFC1 PSIP1
ATP2B1		0.0174662	3	210	Protein targeting to membrane	VPS37C DMTN RPS4X
DMTN		0.0174662	5	951	Viral process	PSIP1 HCFC1 EEA1 VPS37C RPS4X
DNASE1L1		0.0174662	5	1024	Symbiont process	PSIP1 HCFC1 EEA1 VPS37C RPS4X
EEA1		0.0181695	5	1084	Interspecies interaction between organisms	PSIP1 HCFC1 EEA1 VPS37C RPS4X
ENSA		0.0468205	3	357	Establishment of protein localization to membrane	VPS37C DMTN RPS4X
FARSB
GLYR1
HCFC1
IPCEF1
LST1
PSIP1
RPRD1B
RPS4X
VPS37C
